# Supplementary material for: Paving the Way for Brazil’s First National Rare Diseases Registry: The RARAS Data Governance Model
Source: Research Square preprint supplement (doi:10.21203/rs.3.rs-6009008/v1), 2025-04-28
Supplement: Supplementary file 1 [file bb9ef8a209a43a3d13385890.pdf]

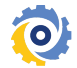

**Notice:** Undefined index: landing\_url in **/var/www/fuji.net/inc\_test.php** on line **40**

**Notice:** Undefined index: landing\_url in **/var/www/fuji.net/inc\_test.php** on line **46**

# FAIR assessment

## Disclaimer:

The test results shown here are based on preliminary data and code which still is under development.  
F-UJI is rapidly evolving and not yet available in a productive environment.

[↗ Click here to assess another data set](#)

## Assessment Results:

## Evaluated Resource:

Atlas Brasileiro Online de Doenças Raras

✓ Save

↓ {JSON}

↗ New

|                                                                                                      |                                                                                             |
|------------------------------------------------------------------------------------------------------|---------------------------------------------------------------------------------------------|
| <b>FAIR level:</b>  | <b>moderate</b>                                                                             |
| <b>Resource PID/URL:</b>                                                                             | <a href="https://raras.org.br/">https://raras.org.br/</a>                                   |
| <b>DataCite support:</b>                                                                             | enabled                                                                                     |
| <b>Metric Version:</b>                                                                               | metrics_v0.5                                                                                |
| <b>Metric Specification:</b>                                                                         | <a href="https://doi.org/10.5281/zenodo.6461229">https://doi.org/10.5281/zenodo.6461229</a> |
| <b>Software version:</b>                                                                             | 3.4.0                                                                                       |
| <b>Download assessment results:</b>                                                                  | <a href="#">{JSON}</a>                                                                      |
| <b>Save and share assessment results:</b>                                                            |                                                                                             |
| Showing cached or saved response. <a href="#">Click here to rerun the assessment</a>                 |                                                                                             |

## Summary:

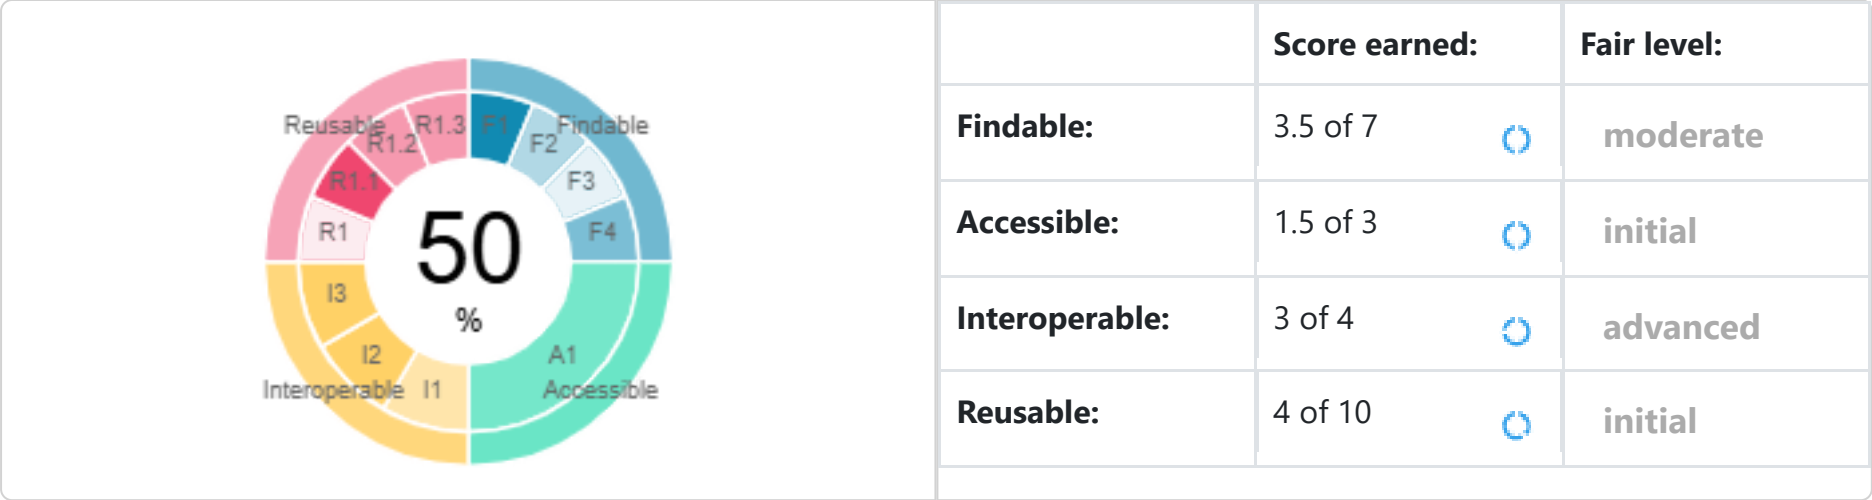

Report:

*Findable*

|                                                                                                                                                                            |  |
|----------------------------------------------------------------------------------------------------------------------------------------------------------------------------|--|
| FsF-F1-01D - Data is assigned a globally unique identifier.                                                                                                                |  |
| FsF-F1-02D - Data is assigned a persistent identifier.                                                                                                                     |  |
| FsF-F2-01M - Metadata includes descriptive core elements (creator, title, data identifier, publisher, publication date, summary and keywords) to support data findability. |  |
| FsF-F3-01M - Metadata includes the identifier of the data it describes.                                                                                                    |  |

FsF-F4-01M - Metadata is offered in such a way that it can be retrieved programmatically.

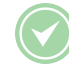

## *Accessible*

FsF-A1-01M - Metadata contains access level and access conditions of the data.

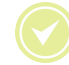

FsF-A1-02M - Metadata is accessible through a standardized communication protocol.

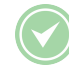

FsF-A1-03D - Data is accessible through a standardized communication protocol.

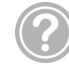

## *Interoperable*

FsF-I1-01M - Metadata is represented using a formal knowledge representation language.

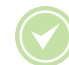

FsF-I2-01M - Metadata uses semantic resources



FsF-I3-01M - Metadata includes links between the data and its related entities.

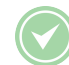

## *Reusable*

FsF-R1-01MD - Metadata specifies the content of the data.

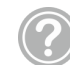

FsF-R1.1-01M - Metadata includes license information under which data can be reused.

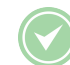

FsF-R1.2-01M - Metadata includes provenance information about data creation or generation.

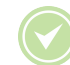

FsF-R1.3-01M - Metadata follows a standard recommended by the target research community of the data.

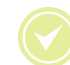

FsF-R1.3-02D - Data is available in a file format recommended by the target research community.

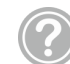[About](#)[Feedback](#)[Privacy Policy](#)[Terms of Use](#)[Legal Notice](#)

F-UJI is a result of the [FAIRsFAIR](#) "Fostering FAIR Data Practices In Europe" project which received funding from the European Union's Horizon 2020 project call H2020-INFRAEOSC-2018-2020 (grant agreement 831558).
